# Supplementary material for: Natural Products as Inducers of Non-Canonical Cell Death: A Weapon against Cancer
Source: MDPI journal article supplement (doi:10.3390/cancers13020304), 2021-01-15
Supplement: s1 [file s1]

Supplementary Materials

Table S1. In vitro induction of ferroptosis by natural products used in association.

| Compound                                                      | Compound source               | Cell line(s)      | Concentration range (where specified) | Time (where specified) | Ferroptosis markers            | Supplementary effects                                                                                                  | Reference                                         |
|---------------------------------------------------------------|-------------------------------|-------------------|---------------------------------------|------------------------|--------------------------------|------------------------------------------------------------------------------------------------------------------------|---------------------------------------------------|
| Albiziabioside A (AlbA) conjugated with dichloroacetate (DCA) | <i>Albizia inundata</i> Mart. | MCF-7             | 2 µM                                  | 24h                    | ↑ Cytotoxicity                 | ↑ after Fe <sup>2+</sup> treatment<br>↓ after Ferr-1 treatment<br>↓ after DFO treatment<br>↓ after vitamin E treatment | [24]                                              |
|                                                               |                               |                   |                                       | /                      | ↑ ROS                          |                                                                                                                        |                                                   |
|                                                               |                               |                   |                                       | 24h                    | ↓ GSH/GSSG ratio               |                                                                                                                        |                                                   |
|                                                               |                               |                   |                                       | 48h                    | ↓ GPX4 expression              |                                                                                                                        |                                                   |
|                                                               |                               |                   |                                       | /                      | ↑ MDA<br>↑ Lipid peroxides     |                                                                                                                        |                                                   |
| Gallic Acid (GA) + low level of laser irradiation             |                               | A375, MDA-MB-231  | 10, 25, 50, 100 and 200 µg/mL         | /                      | ↓ Cell viability               | [44]                                                                                                                   |                                                   |
|                                                               |                               | MDA-MB-231        | 25 µg/mL                              | 24h                    | ↑ ROS                          |                                                                                                                        |                                                   |
|                                                               |                               | A375              | 50 µg/mL                              |                        |                                |                                                                                                                        |                                                   |
|                                                               |                               | A375, MDA-MB-231  | /                                     | /                      | ↑ MDA<br>↓ GPX4 activity       |                                                                                                                        |                                                   |
| Phenethyl isothiocyanate (PEITC) + cotylenin-A (CN-A)         | Cruciferous vegetables        | MIAPaCa-2         | PEITC (5 µM) ± CN-A (10 µg/mL)        | 12 days                | ↓ Anchorage-independent growth | [243]                                                                                                                  |                                                   |
|                                                               |                               | MIAPaCa-2, Panc-1 | PEITC (6 µM) ± CN-A (15 µg/mL)        | 16h                    | ↓ Cell viability               |                                                                                                                        | ↑ after NAC treatment<br>↑ after Trolox treatment |

|                                                      |                        |                                             |                                                                 |     |                             |                                                                                                                                           |      |
|------------------------------------------------------|------------------------|---------------------------------------------|-----------------------------------------------------------------|-----|-----------------------------|-------------------------------------------------------------------------------------------------------------------------------------------|------|
|                                                      |                        |                                             | PEITC (5 $\mu$ M) $\pm$<br>CN-A (20<br>$\mu$ g/mL)              | 24h | $\uparrow$ Cell death       |                                                                                                                                           |      |
|                                                      |                        | Panc-1                                      | PEITC (2, 4, 6<br>and 8 $\mu$ M) $\pm$ CN-<br>A (15 $\mu$ g/mL) | 16h | $\uparrow$ Cell death       | $\downarrow$ after Ferr-1 treatment<br>$\downarrow$ after Lip-1 treatment<br>$\uparrow$ after diferric<br>holotransferrin treatment       |      |
|                                                      |                        | MIAPaCa-2,<br>Panc-1                        | PEITC (4 $\mu$ M) $\pm$<br>CN-A (20<br>$\mu$ g/mL)              | 4h  | $\uparrow$ ROS              |                                                                                                                                           |      |
|                                                      |                        | Panc-1,<br>MIAPaCa-2,<br>CFPAC-1            | PL (2, 4, 6, 8 and<br>10 $\mu$ M) + CN-A<br>(15 $\mu$ g/mL)     | 16h | $\downarrow$ Cell viability |                                                                                                                                           |      |
|                                                      |                        | MIAPaCa-2                                   | PL (6 $\mu$ M) + CN-<br>A (15 $\mu$ g/mL)                       | 16h | $\downarrow$ Cell viability | $\uparrow$ after NAC treatment<br>$\uparrow$ after Ferr-1 treatment<br>$\uparrow$ after Lip-1 treatment<br>$\uparrow$ after DFO treatment |      |
| <b>Piperlongumine (PL) +<br/>cotylenin A (CN-A)</b>  | <i>Piper Longum</i> L. | Panc-1                                      | PL (6 $\mu$ M) + CN-<br>A (15 $\mu$ g/mL)                       | 16h | $\downarrow$ Cell viability | $\uparrow$ after NAC treatment<br>$\uparrow$ after Ferr-1 treatment<br>$\uparrow$ after Lip-1 treatment<br>$\uparrow$ after DFO treatment | [46] |
|                                                      |                        | MIAPaCa-2                                   | PL (7.5 and 15<br>$\mu$ M) $\pm$ CN-A (15<br>$\mu$ g/mL)        | 4h  | $\uparrow$ ROS              |                                                                                                                                           |      |
| <b>Piperlongumine (PL) +<br/>sulfasalazine (SSZ)</b> | <i>Piper Longum</i> L. | Panc-1,<br>MIAPaCa-2,<br>CFPAC-1,<br>BxPC-3 | PL (2.5, 5 and 7.5<br>$\mu$ M) $\pm$ SSZ (200<br>$\mu$ M)       | 16h | $\downarrow$ Cell viability |                                                                                                                                           | [46] |
|                                                      |                        |                                             |                                                                 | 16h | $\downarrow$ Cell viability | $\uparrow$ after NAC treatment                                                                                                            |      |

|                                                                               |                        |                      |                                                                                |     |                  |                                                                 |      |
|-------------------------------------------------------------------------------|------------------------|----------------------|--------------------------------------------------------------------------------|-----|------------------|-----------------------------------------------------------------|------|
|                                                                               |                        | Panc-1,<br>MIAPaCa-2 | PL (5 $\mu$ M) + SSZ<br>(250 $\mu$ M)                                          |     |                  | <u>↑ after Ferr-1 treatment</u><br><u>↑ after DFO treatment</u> |      |
|                                                                               |                        | MIAPaCa-2            | PL (7.5 and 15<br>$\mu$ M) + SSZ (200<br>$\mu$ M)                              | 4h  | ↑ ROS            |                                                                 |      |
| <b>Piperlongumine (PL) +<br/>cotylenin A (CN-A) +<br/>sulfasalazine (SSZ)</b> | <i>Piper Longum</i> L. | PANC-1,<br>MIAPaCa-2 | PL (2, 4, 6 and 8<br>$\mu$ M) + CN-A (15<br>$\mu$ g/mL) + SSZ<br>(250 $\mu$ M) | 16h | ↓ Cell viability | ↑ after Ferr-1 treatment                                        | [46] |

Abbreviations.

↑: Increase; ↓: Decrease; 3-MA: 3-Methyl-adenine; DFO: Deferoxamine; Fe<sup>2+</sup>: Ferrous ion; Ferr-1: Ferrostatin 1; GPX4: Glutathione peroxidase 4; GSH: Glutathione; GSSG: Oxidized glutathione; Lip-1: Liproxastatin-1; MDA: Malondialdehyde; NAC: N-acetylcysteine; ROS: Reactive oxygen species.

**Table S2.** Natural products as *in vivo* inducers of ferroptosis.

| Compound                                                       | Compound source                          | Experimental model(s)                                                                        | Treatment doses                                                                                                       | Antitumor effects and ferroptosis markers                 | Reference |
|----------------------------------------------------------------|------------------------------------------|----------------------------------------------------------------------------------------------|-----------------------------------------------------------------------------------------------------------------------|-----------------------------------------------------------|-----------|
| Amentoflavone                                                  | <i>Selaginella</i> spp. and other plants | BALB/c nude mice inoculated with U251 cells                                                  | 40 and 80 mg/kg/day (for 28 days)                                                                                     | ↓ Tumor volume                                            | [25]      |
|                                                                |                                          |                                                                                              |                                                                                                                       | ↓ Tumor weight                                            |           |
| ↓ GSH                                                          |                                          |                                                                                              |                                                                                                                       |                                                           |           |
| ↑ MDA                                                          |                                          |                                                                                              |                                                                                                                       |                                                           |           |
| ↓ FTH                                                          |                                          |                                                                                              |                                                                                                                       |                                                           |           |
| ↑ LC3B, ↑ Beclin1, ↑ ATG5, ↑ ATG7                              |                                          |                                                                                              |                                                                                                                       |                                                           |           |
| Artenusate (artemisin semi-synthetic derivative)               | <i>Artemisia annua</i> L.                | NOD/SCID mice inoculated with CA-46 cells                                                    | 200 mg/kg/day (30 days)                                                                                               | ↓ Tumor volume                                            | [29]      |
|                                                                |                                          |                                                                                              |                                                                                                                       | ↓ Tumor weight                                            |           |
|                                                                |                                          |                                                                                              |                                                                                                                       | ↑ MDA                                                     |           |
|                                                                |                                          |                                                                                              |                                                                                                                       | ↑ CHAC1 expression                                        |           |
|                                                                |                                          | BALB/c nude mice inoculated with AsPC-1 cells transfected with control (CTRL) or GRP78 shRNA | 30 mg/kg every 2 days (35 days)                                                                                       | ↓ Tumor growth (> than CTRL shRNA)                        | [32]      |
|                                                                |                                          |                                                                                              |                                                                                                                       | ↓ Tumor volume (> than CTRL shRNA)                        |           |
|                                                                |                                          |                                                                                              |                                                                                                                       | ↓ Tumor weight (> than CTRL shRNA)                        |           |
| Dihydroartemisinin (artemisin semi-synthetic derivative) (DAT) | <i>Artemisia annua</i> L.                | Foxn1nu/ Foxn1+ athymic mice inoculated with GPX4 iKO H292 cells                             | DAT 5 mg/kg/day, normal diet/DAT 5 mg/kg/day, DOX diet / DAT 5 mg/kg/day + DOX and Lip-1 10 mg/kg (14 days)           | ↓ Tumor growth (partially restored after Lip-1 treatment) | [63]      |
| Withaferin A                                                   | <i>Withania somnifera</i> L. Dunal       | BALB/c nude mice inoculated with IMR-32 cells                                                | Bi-sequential treatment (4 days treatment with 4 mg/kg/day + 6 days of recovery + 3 days treatment with 4 mg/kg/day); | ↓ Tumor growth                                            | [52]      |
|                                                                |                                          |                                                                                              |                                                                                                                       | ↓ Tumor relapse rates                                     |           |
| CD45-positive immune cells infiltration in tumor tissue        |                                          |                                                                                              |                                                                                                                       |                                                           |           |
| ↓ GPX4 expression                                              |                                          |                                                                                              |                                                                                                                       |                                                           |           |

|                                                    |                                                                |
|----------------------------------------------------|----------------------------------------------------------------|
| continuous treatment (4<br>mg/kg/day, for 20 days) | ↑ LOOH                                                         |
|                                                    | ↑ phospholipids<br>(phosphatidylglycerol/phosphatidylinositol) |
| WA-NPs<br>(days 1 and 5, 14 days)                  | ↓ Tumor growth                                                 |

Abbreviations.

↑: Increase; ↓: Decrease ATG5: Autophagy related 5; ATG7: Autophagy related 7; CHAC1: Glutathione-specific gamma-glutamylcyclotransferase 1; DOX: Doxorubicin; FTH: Ferritin heavy chain; GPX4: Glutathione peroxidase IV; GSH: Glutathione; LC3B: Microtubule-associated protein 1 (MAP1) light chain 3B; Lip-1: Liproxastatin-1; LOOH: Lipid hydroperoxides; MDA: Malondialdehyde; Spp.: species; WA-NPs: Withaferin A nanoparticles

**Table S3.** *In vitro* induction of necroptosis by natural products used in association.

| Compound                                  | Compound source                                                            | Cell line(s)                     | Concentrations (where specified) | Time (where specified)                                | Necroptosis markers                                   | Supplementary effects              | Reference |
|-------------------------------------------|----------------------------------------------------------------------------|----------------------------------|----------------------------------|-------------------------------------------------------|-------------------------------------------------------|------------------------------------|-----------|
| <b>Arctigenin (A) + desamethasone (D)</b> | <i>Arctium lappa</i> L., <i>Saussurea heteromalla</i>                      | RPMI-2650                        | A (5 $\mu$ M) + D (12.5 $\mu$ M) | 48h                                                   | $\uparrow$ Necrotic cells                             | $\downarrow$ after NAC treatment   | [114]     |
|                                           |                                                                            |                                  |                                  |                                                       | $\uparrow$ ROS                                        | $\downarrow$ after NAC treatment   |           |
|                                           |                                                                            |                                  |                                  |                                                       | $\downarrow$ $\Delta\Psi_m$                           | $\uparrow$ after NAC treatment     |           |
|                                           |                                                                            |                                  |                                  |                                                       | $\downarrow$ ATP levels                               | $\downarrow$ after Nec-1 treatment |           |
|                                           |                                                                            |                                  |                                  |                                                       |                                                       | $\downarrow$ after Nec-1 treatment |           |
|                                           |                                                                            |                                  |                                  |                                                       | $\uparrow$ RIP3, $\uparrow$ p-RIP3 protein expression | $\downarrow$ after ATP treatment   |           |
|                                           |                                                                            |                                  |                                  |                                                       |                                                       | $\downarrow$ after NAC treatment   |           |
|                                           |                                                                            |                                  |                                  |                                                       | $\uparrow$ MLKL, $\uparrow$ p-MLKL protein expression | $\downarrow$ after Nec-1 treatment |           |
|                                           |                                                                            |                                  |                                  |                                                       |                                                       | $\downarrow$ after ATP treatment   |           |
|                                           |                                                                            |                                  |                                  |                                                       |                                                       | $\downarrow$ after NAC treatment   |           |
|                                           | $\uparrow$ p-ATM, $\uparrow$ p-ATR, $\uparrow$ p-CHK1/2 protein expression | $\downarrow$ after NAC treatment |                                  |                                                       |                                                       |                                    |           |
|                                           | 24, 48 and 72h                                                             | $\downarrow$ Cell viability      | $\uparrow$ after Nec-1 treatment |                                                       |                                                       |                                    |           |
|                                           |                                                                            |                                  | $\uparrow$ after ATP treatment   |                                                       |                                                       |                                    |           |
|                                           |                                                                            |                                  | $\uparrow$ after NAC treatment   |                                                       |                                                       |                                    |           |
|                                           | RPMI-2650 spheroid cells                                                   | A (5 $\mu$ M) + D (12.5 $\mu$ M) | 48h                              | $\uparrow$ Cytotoxicity                               | $\downarrow$ after NAC treatment                      |                                    |           |
|                                           |                                                                            |                                  |                                  | $\downarrow$ Spheroid viability                       | $\uparrow$ after NAC treatment                        |                                    |           |
|                                           |                                                                            |                                  |                                  | $\uparrow$ RIP3, $\uparrow$ p-RIP3 protein expression | $\downarrow$ after NAC treatment                      |                                    |           |
|                                           |                                                                            |                                  |                                  | $\uparrow$ MLKL, $\uparrow$ p-MLKL protein expression | $\downarrow$ after NAC treatment                      |                                    |           |
| <b>Berberine (B) + cisplatin (Cis)</b>    | Huang Lian Chinese herb ( <i>Coptis chinensis</i> ) and others plant spp.  | OVCAR3                           | B (100 $\mu$ M) + Cis (5 mg/mL)  | 24h                                                   | Extensive vacuolation                                 | [116]                              |           |
|                                           |                                                                            |                                  |                                  |                                                       | Rupture of plasma membrane                            |                                    |           |
|                                           |                                                                            |                                  |                                  |                                                       | $\uparrow$ RIP3, $\uparrow$ MLKL mRNA levels          |                                    |           |
|                                           |                                                                            | OVCAR3, POCCLs                   |                                  |                                                       | $\uparrow$ RIP3, p-RIP3 protein expression            |                                    |           |
|                                           |                                                                            |                                  |                                  |                                                       | $\uparrow$ MLKL, p-MLKL protein expression            |                                    |           |

|                                                             |                                            |            |                    |                |                               |                             |
|-------------------------------------------------------------|--------------------------------------------|------------|--------------------|----------------|-------------------------------|-----------------------------|
| <b>Goniothalamins</b><br>+ <b>Z-VAD-FMK</b><br><b>10 μM</b> | Plants of<br><i>Goniothalamus</i><br>genus | MDA-MB-231 | 33.82 μM           | 24h            | ↑ PI positive cells           |                             |
|                                                             |                                            |            |                    |                | Loss of membrane integrity    |                             |
|                                                             |                                            |            |                    |                | No caspase-3/-8/-9 activation |                             |
|                                                             |                                            |            |                    | 1, 2, 4 and 6h | ↑ Calpain activity            | ↓ after Z-LLY-FMK treatment |
|                                                             |                                            |            |                    |                | ↑ ROS                         | ↓ after NAC treatment       |
|                                                             |                                            |            | 13.53 and 33.82 μM | 24h            | ↑ Ca <sup>2+</sup> levels     |                             |
|                                                             |                                            |            |                    |                | ↑ RIP3 protein expression     |                             |
|                                                             |                                            |            |                    |                | ↑ Cleaved AIF                 |                             |

[244]

Abbreviations.

↑: Increase; ↓: Decrease; AIF: Apoptosis-inducing factor; ATP: Adenosine triphosphate; Ca<sup>2+</sup>: Calcium; MLKL: Mixed lineage kinase domain like pseudokinase; NAC: N-acetyl-L-cysteine; Nec-1: Necrostatin-1; p-ATM: Phospho-ataxia telangiectasia mutated kinase; p-ATR: Phospho-ataxia telangiectasia and Rad3-related kinase; p-CHK1/2: Phospho-checkpoint kinase 1/2; p-MKLK: Phospho-mixed lineage kinase domain like pseudokinase; p-RIP3: Phospho-receptor-interacting serine/threonine-protein kinase 3; PI: Propidium iodide; RIP3: Receptor-interacting serine/threonine-protein kinase 3; ROS: Reactive oxygen species; Spp.: species; Z-LLY-FMK: Calpain inhibitor; ΔΨ<sub>m</sub>: Mitochondrial membrane potential.

**Table S4:** Natural products as *in vivo* inducers of necroptosis.

| Compound                           | Compound source                                                               | Experimental model(s)                             | Treatment doses                     | Necroptosis markers                                                                                                                                                                                 | Reference |
|------------------------------------|-------------------------------------------------------------------------------|---------------------------------------------------|-------------------------------------|-----------------------------------------------------------------------------------------------------------------------------------------------------------------------------------------------------|-----------|
| 2-methoxy-6-acetyl-7-methyljuglone | <i>Polygonum cuspidatum</i> Sieb. et Zucc                                     | U251-derived xenograft zebrafish model            | 50 nM (3 days)                      | No caspase- 3/-7/-8 cleavage<br>↑ p-JNK1/2<br>↑ HMGB1                                                                                                                                               | [108]     |
|                                    |                                                                               | BALB/c nude mice inoculated with A549 cells       | 1 and 2 mg/kg/day (18 days)         | ↓ Tumor growth<br>↓ Tumor volume<br>↓ Tumor weight<br>↑ RIP1 protein expression<br>↑ p-RIP3 protein expression<br>Intact cell nuclei<br>Damaged mitochondria                                        | [109]     |
| Emodin                             | <i>Rheum palmatum</i> L.                                                      | BALB/c nude mice inoculated with U251 cells       | 20, 40 and 80 mg/kg/day (28 days)   | ↓ Tumor growth<br>↓ Tumor volume<br>↓ Tumor weight<br>↑ RIP1 protein expression<br>↑ RIP3 protein expression<br>↑ MLKL protein expression<br>↑ TNF- $\alpha$ protein expression<br>↑ Tumor necrosis | [121]     |
| Pristimerin                        | Various plant spp. of <i>Celastraceae</i> and <i>Hippocrateaceae</i> families | BALB/c nude mice inoculated with C6 cells         | 1 and 3 mg/kg every 2 days (8 days) | ↓ Tumor volume<br>↓ Tumor weight<br>↑ JNK protein expression<br>↑ p-JNK protein expression<br>↑ AIF nuclear translocation                                                                           | [127]     |
| Resibufogenin                      | Asiatic toad ( <i>Bufo gargarizans</i> )                                      | BALB/c nude mice inoculated with eGFP-SW480 cells | 5 and 10 mg/kg/day (21 days)        | ↓ Tumor volume (partially restored after RIP3 knockdown)<br>↓ Tumor weight                                                                                                                          | [129]     |



|                 |                                                                                                                                  |                                                     |                                            |                                                                                                                                                                                                              |
|-----------------|----------------------------------------------------------------------------------------------------------------------------------|-----------------------------------------------------|--------------------------------------------|--------------------------------------------------------------------------------------------------------------------------------------------------------------------------------------------------------------|
|                 |                                                                                                                                  |                                                     | (partially restored after RIP3 knockdown)  |                                                                                                                                                                                                              |
|                 |                                                                                                                                  |                                                     | ↑ RIP3 protein expression                  |                                                                                                                                                                                                              |
|                 |                                                                                                                                  |                                                     | ↑ PYGL, ↑ GLUL, ↑ GLUD1 protein expression |                                                                                                                                                                                                              |
|                 |                                                                                                                                  | C57BL6/j mice inoculated with eGFP-MC38 cells       | ↓ Number of liver metastatic foci          |                                                                                                                                                                                                              |
|                 |                                                                                                                                  |                                                     | ↓ Size of liver metastatic foci            |                                                                                                                                                                                                              |
|                 |                                                                                                                                  | Nude mice inoculated with CNE-2Z cells              | 0.5 and 1 mg/kg every 3 days (21 days)     | ↓ Tumor growth<br>↓ Tumor weight<br>↑ Tumor necrosis<br>[133]                                                                                                                                                |
|                 |                                                                                                                                  | BALB/c athymic nude mice inoculated with A549 cells | 2 mg/kg/day (14 days)                      | ↓ Tumor growth<br>↓ Tumor volume<br>↓ Tumor weight<br>↑ Tumor necrosis<br>[134]                                                                                                                              |
|                 |                                                                                                                                  |                                                     | ↑ RIP1 protein expression                  |                                                                                                                                                                                                              |
|                 |                                                                                                                                  | BALB/c nude mice inoculated with K7 cells           | 2 mg/kg/day (7 days)                       | ↓ Tumor growth<br>↓ Tumor volume<br>↓ Tumor weight<br>↑ RIP1 protein expression<br>↑ RIP3 protein expression<br>↓ Number of lung metastasis<br>↓ Lung weight<br>↑ Tumor necrosis in lung metastasis<br>[136] |
|                 |                                                                                                                                  |                                                     | ↓ Tumor volume                             |                                                                                                                                                                                                              |
|                 |                                                                                                                                  |                                                     | ↓ Tumor weight                             |                                                                                                                                                                                                              |
|                 |                                                                                                                                  | BALB/c nude mice inoculated with C6 cells           | 2 mg/kg every 2 days for 4 times           | ↑ RIP1 protein expression<br>↑ RIP3 protein expression<br>↑ $\gamma$ -H2AX protein expression<br>↑ p-ATM protein expression<br>[140]                                                                         |
| <b>Shikonin</b> | <i>Lithospermum erythrorhizon</i> Siebold & Zucc.,<br><i>Arnebia euchroma</i> (Royle) Johnst, or<br><i>Arnebia guttata</i> Bunge |                                                     |                                            |                                                                                                                                                                                                              |

|                                             |                                  |                                                         |       |
|---------------------------------------------|----------------------------------|---------------------------------------------------------|-------|
|                                             |                                  | RIP1-RIP3 interaction                                   |       |
|                                             |                                  | ↑ HMGB1 protein expression                              |       |
|                                             |                                  | ↑ HSP70 protein expression                              |       |
|                                             |                                  | ↑ Calreticulin protein expression                       |       |
|                                             |                                  | Macrophages infiltration in tumor tissue                |       |
|                                             |                                  | ↓ Tumor volume                                          |       |
|                                             |                                  | ↑ Cytoplasmatic/mitochondrial p-MLKL protein expression | [141] |
|                                             |                                  | ↓ Mitochondrial AIF protein expression                  |       |
|                                             |                                  | ↑ Cytoplasmatic/nuclear AIF protein expression          |       |
|                                             |                                  | ↓ Tumor growth                                          |       |
| BALB/c nude mice inoculated with 5-8F cells | 0.5 mg/kg every 3 days (21 days) | ↓ Tumor weight                                          | [142] |
|                                             |                                  | ↑ Tumor necrosis                                        |       |

#### Abbreviations.

↑: Increase; ↓: Decrease; AIF: Apoptosis-inducing factor; GLUD1: Glutamate dehydrogenase; GLUL: Glutamine synthetase; HMGB1: High-mobility group box 1; HSP70: Heat shock protein 70; JNK: c-Jun-N-terminal kinase; MLKL: Mixed lineage kinase domain like pseudokinase; p-ATM: Phospho-ataxia telangiectasia mutated kinase; p-JNK1/2: Phospho-c-Jun N-terminal kinase 1/2; p-MLKL: Phospho-mixed lineage kinase domain like pseudokinase; p-RIP3: Phospho-receptor-interacting serine/threonine-protein kinase 3; PYGL: Glycogen phosphorylase; RIP1: Receptor-interacting serine/threonine-protein kinase 1; RIP3: Receptor-interacting serine/threonine-protein kinase 3; TNF- $\alpha$ : Tumor necrosis factor- $\alpha$ ;  $\gamma$ -H2AX: Phospho-H2A histone family member X.

**Table S5.** Natural products as *in vivo* inducers of pyroptosis

| Compound          | Compound source                                                                                                                  | Experimental model(s)                         | Treatment doses                         | Antitumor effects and pyroptosis markers                                                                                                                               | Reference |
|-------------------|----------------------------------------------------------------------------------------------------------------------------------|-----------------------------------------------|-----------------------------------------|------------------------------------------------------------------------------------------------------------------------------------------------------------------------|-----------|
| Alpinumisoflavone | <i>Derris eriocarpa</i> F.C                                                                                                      | BALB/c nude mice inoculated with KYSE30 cells | 40 and 80 mg/kg/day (30 days)           | ↓ Tumor volume<br>↓ Tumor weight<br>↑ GSDME, ↑ cleaved caspase-3, ↑ Bax expression                                                                                     | [198]     |
|                   |                                                                                                                                  | BALB/c nude mice inoculated with TPC-1 cells  | 20 and 40 mg/kg/day (30 days)           | ↓ Tumor volume<br>↓ Tumor weight<br>↑ NLRP3, ↑ cleaved caspase-1, ↑ cleaved IL-1 $\beta$ , ↑ cleaved IL-18, ↑ cleaved GSDMD protein expression                         | [199]     |
| Berberine         | Huang Lian Chinese herb ( <i>Coptis chinensis</i> ) and others plant spp.                                                        | BALB/c-nude mice inoculated with HepG2 cells  | 20 mg/kg/day (21 days)                  | ↓ Tumor volume<br>(partially restored after AC-YVAD-CMK treatment)<br>↑ Caspase-1 mRNA and protein expression<br>(↓ after AC-YVAD-CMK treatment)                       | [201]     |
| Dioscin           | <i>Polygonatum zanzlanscianense</i> Pamp.,<br><i>Dioscorea nipponica</i> Makino, and <i>Dioscorea zingiberensis</i> C. H. Wright | BALB/c mice inoculated with MNNG/HOS cells    | 12 and 24 mg/kg, every 3 days (15 days) | ↓ Tumor volume<br>↓ Tumor weight<br>↑ GSDME-NT expression<br>↑ Cleaved caspase-3 expression                                                                            | [203]     |
| Huaier extract    | <i>Trametes robiniophila</i> murr (Huaier)                                                                                       | BALB/c nude mice inoculated with H520 cells   | 50 mg/mL/day (28 days)                  | ↓ Tumor volume<br>↑ NLRP3, ↑ cleaved-caspase-1, ↑ IL-1 $\beta$ , ↑ IL-18 protein levels in tumor tissue                                                                | [205]     |
| Polyphyllin VI    | <i>Trillium tschonoskii</i> Maxim                                                                                                | Athymic nude mice inoculated with A549 cells  | 2.5, 5 and 10 mg/kg/day (10 days)       | ↑ NLRP3, ↑ cleaved caspase-1, ↑ cleaved IL-1 $\beta$ , ↑ cleaved GSDMD protein levels<br>↑ NLRP3, ↑ caspase-1, ↑ IL-1 $\beta$ , ↑ GSDMD protein levels in tumor tissue | [195]     |

Abbreviations.

↑: Increase; ↓: Decrease; AC-YVAD-CMK: Caspase-1 inhibitor; GSDMD: Gasdermin D; GSDME: Gasdermin E; GSDME-NT: N terminal fragment of Gasdermin E; IL-18: Interleukin-18; IL-1 $\beta$ : Interleukin 1 beta; NLRP3: NLR (nucleotide-binding oligomerization domain (NOD)-like receptor) family pyrin domain-containing 3; Spp.: species
